# Supplementary material
Source: PubMed Central journal article supplement (PMC4698027)
Supplement: NIHMS744298-supplement.pdf [file NIHMS744298-supplement.pdf]

A/USSR/90/1977 APLQLGKNCIAGWILGNPECESLFSKKSWSYIAETPNSENGTCYPGYFAD 101  
A/Kawasaki/6/1986 APLQLGNCS IAGWILGNPECESLFSKKSWSYIAETPNSENGTCYPGYFAD  
A/Massachusetts/1/1990 APLQLGNCS IAGWILGNPECESLFSKESWSYIAETPNSENGTCYPGYFAD  
A/Wellington/47/1992 APLQLGNCS IAGWILGNPECESLFSKESWSYIAETPDPENGTCYPGYFAD  
A/Florida/2/1993 APLQLGNCSVAGWILGNPECESLFTKESWSYIAETPNPENGTCYPGYFAD  
A/Beijing/262/1995 APLQLGNCSVAGWILGNPECESLISKESWSYIVETPNPENGTCYPGYFAD  
A/New Caledonia/20/1999 APLQLGNCSVAGWILGNPECELLISKESWSYIVETPNPENGTCYPGYFAD  
A/North Carolina/3/2003 APLQLGNCSVAGWILGNPECELLISKESWSYIVETPNPENGTCYPGYFAD  
A/North Carolina/U306-0365/2007 APLQLGNCSVAGWILGNPECELLISKESWSYIVETPNPENGTCYPGYFAD  
A/Solomon Islands/03/2006 APLQLGNCSVAGWILGNPECELLISRESWSYIVEKPNPENGTCYPGHFAD  
A/North Carolina/AF1292/2008 APLQLGNCSVAGWILGNPECELLISKESWSYIVEKPNPENGTCYPGHFAD  
A/California/07/2009 APLHLGKNCIAGWILGNPECESLSTASSWSYIVETPSSDNGTCYPGDFID  
\*\*\* \*\* \* \*\*\*\*\* \* \*\*\*\*\* \* \*\*\*\*\* \*

133a

A/USSR/90/1977 YEELREQLSSVSSFERFEIIPKERSWPKHNVTGVTASC SHKGRSSFYRN 150  
A/Kawasaki/6/1986 YEELREQLSSVSSFERFEIIPKESWPNHTVTGVTASC SHKGRSSFYRN  
A/Massachusetts/1/1990 YEELREQLSSVSSFERFEIIPKESWPNHTVTGVTASC SHNGKSSFYRN  
A/Wellington/47/1992 YEELREQLSSVSSFERFEIIPKESWPNHTVTGVTASC SHNGKSSFYRN  
A/Florida/2/1993 YEELREQLSSVSSFERFEIIPKESWPNHTVTGVTASC SHNGKSSFYRN  
A/Beijing/262/1995 YEELREQLSSVSSFERFEIIPKESWPNHTVTGVTASC SHNGKSSFYRN  
A/New Caledonia/20/1999 YEELREQLSSVSSFERFEIIPKESWPHHTVTGVSASC SHNGKSSFYRN  
A/North Carolina/3/2003 YEELREQLSSVSSFERFEIIPKESWPHHTVTGVSASC SHNGKSSFYRN  
A/North Carolina/U306-0365/2007 YEELREQLSSVSSFERFEIIPKESWPNHTVTGVSASC SHNGKSSFYRN  
A/Solomon Islands/03/2006 YEELREQLSSVSSFERFEIIPKESWPNHTTTGVSASC SHNGESSFYKN  
A/North Carolina/AF1292/2008 YEELREQLSSVSSFERFEIIPKESWPNHTVTGVSASC SHNGESSFYRN  
A/California/07/2009 YEELREQLSSVSSFERFEIIPKTSWPNHDSNKVTAACPHAGAKSFYKN  
\*\*\*\*\* \*\* \* \*\*\*\*\* \*\* \* \*\*\*\*\* \*\* \* \*\*\*\*\* \*\* \*

190-helix

A/USSR/90/1977 LLWLTEKNGSYPNLSKSYVNNKEKEVLVLWGVHHPNIEDQKTIYRKENA 200  
A/Kawasaki/6/1986 LLWLTEKNGSYPNLSKSYVNNKEKEVLVLWGVHHPNIRDQAIYHTENA  
A/Massachusetts/1/1990 LLWLTEKNGLYPNLSKSYVNNKEKEVLVLWGVHHPNIGDQAIYHTENA  
A/Wellington/47/1992 LLWLTKKNGLYPNLSKSYVNNKEKEVLVLWGVHHPNIGDQAIYHTENA  
A/Florida/2/1993 LLWLTEKNGLYPNLSKSYVNNKEKEVLVLWGVHHPNMGDQAIYHTENA  
A/Beijing/262/1995 LLWLTEKNGLYPNLSNSYVNNKEKEVLVLWGVHHPNIRDQAIYHTENA  
A/New Caledonia/20/1999 LLWLTKKNGLYPNLSKSYVNNKEKEVLVLWGVHHPNIGDQALYHTENA  
A/North Carolina/3/2003 LLWLTKKNGLYPNLSKSYVNNKEKEVLVLWGVHHPNIGDQALYHTENA  
A/North Carolina/U306-0365/2007 LLWLTKKNGLYPNLSKSYANNKEKEVLVLWGVHHPNIGDQALYHTENA  
A/Solomon Islands/03/2006 LLWLTKKNGLYPNLSKSYANNKEKEVLVLWGVHHPNIGDQALYHTENA  
A/North Carolina/AF1292/2008 LLWLTKKNGLYPNLSKSYANNKEKEVLVLWGVHHPNIGDQALYHTENA  
A/California/07/2009 LIWLTKKNGSYPNLSKSYINDKGEVLVLWGVHHPNIGDQALYHTENA  
\* \* \* \* \* \*\* \* \* \* \* \* \*\* \* \* \* \* \* \*\* \* \* \* \* \*

226

A/USSR/90/1977 YVSVVSSNYNRRFTPEIAERPKVRDQAGRINYWTLLPEGDTIIFEANGN 250  
A/Kawasaki/6/1986 YVSVVSSHYNRRFTPEIAKRPKVRDQAGRINYWTLLPEGDTIIFEANGN  
A/Massachusetts/1/1990 YVSVVSSHYSRRFTPEIAKRPKVRDQAGRINYWTLLPEGDTIIFEANGN  
A/Wellington/47/1992 YVSVVSSHYSRRFTPEIAKRPKVRDQAGRINYWTLLPEGDTIIFEANGN  
A/Florida/2/1993 YVSVVSSHYSRRFTPEIAKRPKVRDQAGRINYWTLLPEGDTIIFEANGN  
A/Beijing/262/1995 YVSVVSSHYSRRFTPEIAKRPKVRDQAGRINYWTLLPEGDTIIFEANGN  
A/New Caledonia/20/1999 YVSVVSSHYSRRFTPEIAKRPKVRDQAGRINYWTLLPEGDTIIFEANGN  
A/North Carolina/3/2003 YVSVVSSHYSRRFTPEIAKRPKVRDQAGRINYWTLLPEGDTIIFEANGN  
A/North Carolina/U306-0365/2007 YVSVVSSHYSRRFTPEIAKRPKVRDQAGRINYWTLLPEGDTIIFEANGN  
A/Solomon Islands/03/2006 YVSVVSSHYSRRFTPEIAKRPKVRDQAGRINYWTLLPEGDTIIFEANGN  
A/North Carolina/AF1292/2008 YVSVVSSHYSRRFTPEIAKRPKVRDQAGRINYWTLLPEGDTIIFEANGN  
A/California/07/2009 YVSVVSSHYSRRFTPEIAKRPKVRDQAGRINYWTLLPEGDTIIFEANGN  
YVSVVSSSRYSKPKPEIAIRPKVRDQEGRMNYWTLLPEGDKITFEATGN  
\*\* \* \* \* \* \* \* \* \* \* \* \* \* \* \* \* \* \* \* \* \* \* \* \* \* \* \* \* \*

A/USSR/90/1977 LIAPWHAFALNRGFGSG 267  
A/Kawasaki/6/1986 LIAPWYAFALSRGFGSG  
A/Massachusetts/1/1990 LIAPWYAFALSRGLGSG  
A/Wellington/47/1992 LIAPWYAFALSRGFGSG  
A/Florida/2/1993 LIAPRYAFALSRGFGSG  
A/Beijing/262/1995 LIAPWYAFALSRGFGSG  
A/New Caledonia/20/1999 LIAPWYAFALSRGFGSG  
A/North Carolina/3/2003 LIAPRYAFALSRGFGSG  
A/North Carolina/U306-0365/2007 LIAPRFALSRGFGSG  
A/Solomon Islands/03/2006 LIAPRYAFALSRGFGSG  
A/North Carolina/AF1292/2008 LIAPRYAFALSRGFGSG  
A/California/07/2009 LVVPRYAFAMERNAGSG  
\* \* \* \* \* \* \* \* \* \* \* \* \* \* \* \* \* \* \* \* \* \* \* \* \* \* \* \*

Figure S1. Sequence alignment of H1 influenza virus HA1s from 1977-2009 used in this study, Related to Figure 1. Residues of the RBS are highlighted in yellow with other key residues highlighted and marked. See also Figure 1.

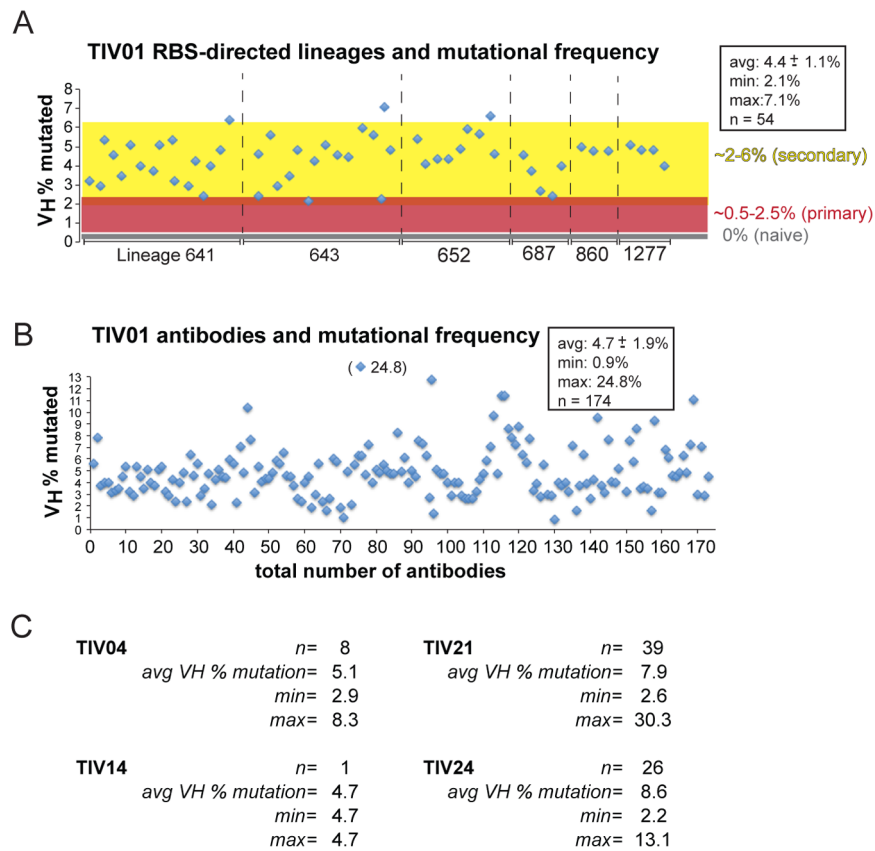

**Figure S2. Mutational frequency of isolated TIV antibodies, Related to Figure 2, Figure 3 and Figure 4. (A)** Average  $V_H$  mutational frequency of RBS-directed lineages. For reference, the approximate mutational frequencies expected for naïve, primary and secondary responses are listed. **(B)** Average  $V_H$  mutational frequency of all HA-specific antibodies isolated from TIV01 day 7 plasmablasts. **(C)** Average  $V_H$  mutational frequency of all HA-specific antibodies isolated from additional TIV cohort (Moody et al, 2011). See also **Figure 2, Figure 3 and Figure 4.**

|              | Massachusetts  | Solomon Islands |
|--------------|----------------|-----------------|
|              | $\Delta$ K133a | +K133a          |
| Lin 641 UCA  | >100           | 1.9             |
| Lin 643 UCA  | >100           | >100            |
| Lin 652 UCA  | >100           | >100            |
| Lin 687 UCA  | >100           | 3.6             |
| Lin 860 UCA  | >100           | 59              |
| Lin 1277 UCA | >100           | 2.2             |

**Figure S3. Dependence of UCA binding on residue K133a, Related to Figure 1 and Figure 5.** Affinities (in  $\mu$ M) for UCAs with deletion ( $\Delta$ ) in H1 Massachusetts (1990) or insertion (+) in H1 Solomon Islands (2006). See also Figure 1 and Figure 5.

A

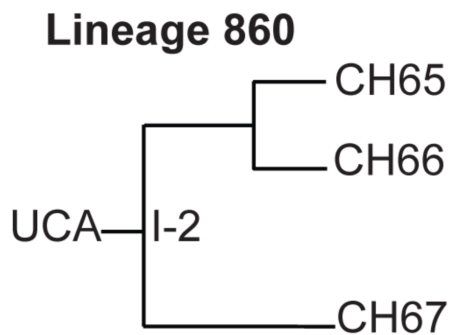

B

|                      | UCA  | I-2  |
|----------------------|------|------|
| CALIFORNIA (09)      | >100 | >100 |
| NORTH CAROLINA (08)  | >100 | >100 |
| NORTH CAROLINA (07)  | >100 | >100 |
| SOLOMON ISLANDS (06) | >100 | >100 |
| NORTH CAROLINA (03)  | >100 | >100 |
| NEW CALEDONIA (99)   | >100 | >100 |
| BEIJING (95)         | 32.6 | >100 |
| FLORIDA (93)         | 34   | 13.7 |
| WELLINGTON (92)      | >100 | 42   |
| MASSACHUSETTS (90)   | 15.3 | 1.3  |
| KAWASAKI (86)        | >100 | >100 |
| USSR (77)            | 15.6 | >100 |

**Figure S4. Related to Figure 2 and Figure 6. Lineage 860 UCA and I-2 HA-reactivity. (A)** Lineage 860 clonal tree; **(B)** data for UCA and I-2 binding to members of the panel of H1 HA1s.  $K_D$  values, expressed in mM, are for interaction of monomeric Fab and HA head. See also **Figure 2** and **Figure 6**.
